# Supplementary material for: What is the cause(s) of positive ozone trends in three megacity clusters in eastern China during 2015–2020?
Source: Copernicus journal article supplement (doi:10.5194/egusphere-2023-1088), 2023-06-13
Supplement: Supplementary file 1 [file egusphere-2023-1088-supplement.pdf]

# What is the cause(s) of positive ozone trends in three megacity clusters in eastern China during 2015-2020?

Tingting Hu<sup>1</sup>, Yu Lin<sup>1</sup>, Run Liu<sup>1,2</sup>, Yuepeng Xu<sup>1</sup>, Boguang Wang<sup>1,2</sup>, Yuanhang Zhang<sup>3</sup>, Shaw Chen Liu<sup>1,2</sup>

5 <sup>1</sup>Institute for Environmental and Climate Research, Jinan University, Guangzhou, 511443, China

<sup>2</sup>Guangdong-Hongkong-Macau Joint Laboratory of Collaborative Innovation for Environmental Quality, Guangzhou, 511443, China

<sup>3</sup>State Key Joint Laboratory of Environmental Simulation and Pollution Control, College of Environmental Sciences and Engineering, Peking University, Beijing, 100871, China

10 *Correspondence to:* Run Liu (liurun@jnu.edu.cn), Shaw Chen Liu (shawliu@jnu.edu.cn)

Supplementary Figures

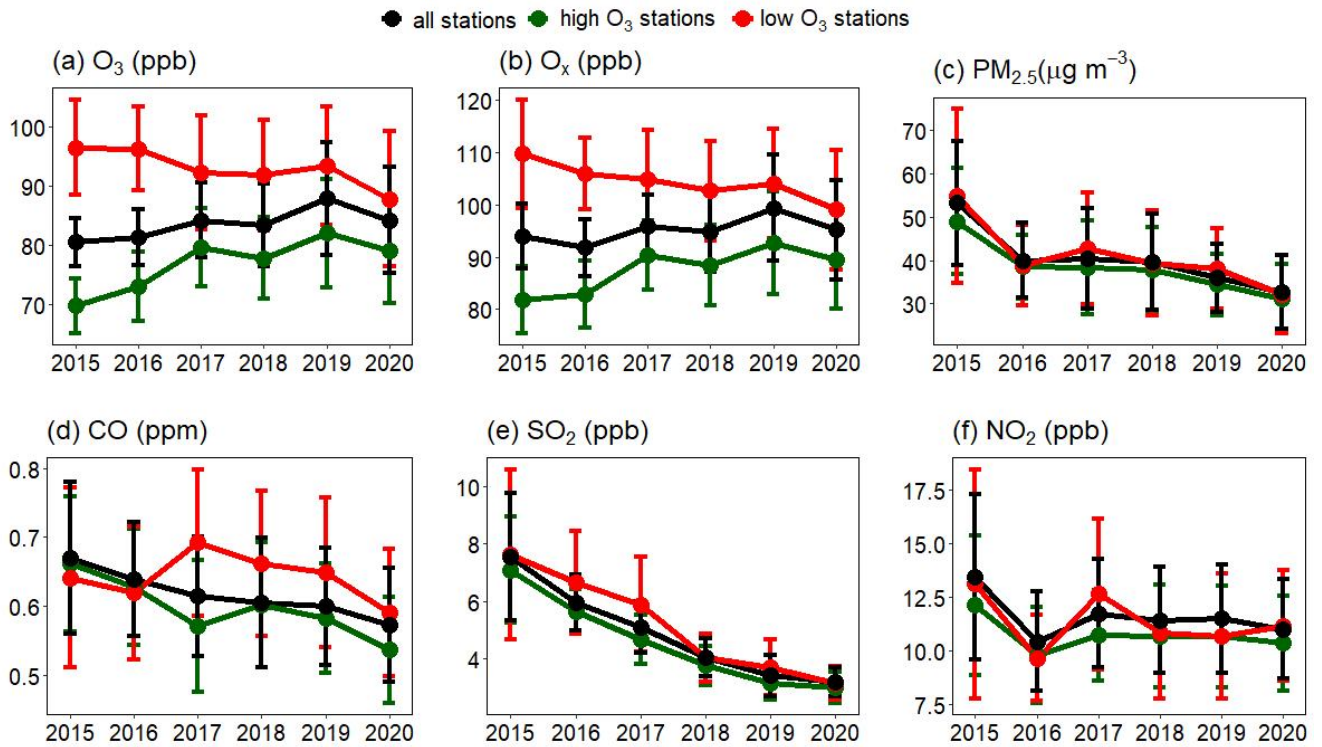

**Figure S1.** Annual mean concentrations of maximum daily 8-hour average O<sub>3</sub> in YRD during O<sub>3</sub>-exceeding days for all stations (black), high O<sub>3</sub> stations (red) and low O<sub>3</sub> stations (green) (a), same as (a) except for O<sub>x</sub> (b), PM<sub>2.5</sub> (c), CO (d), SO<sub>2</sub> (e), NO<sub>2</sub> (f). The criterion of low O<sub>3</sub> stations is 37days, and the number of low O<sub>3</sub> stations is 54.

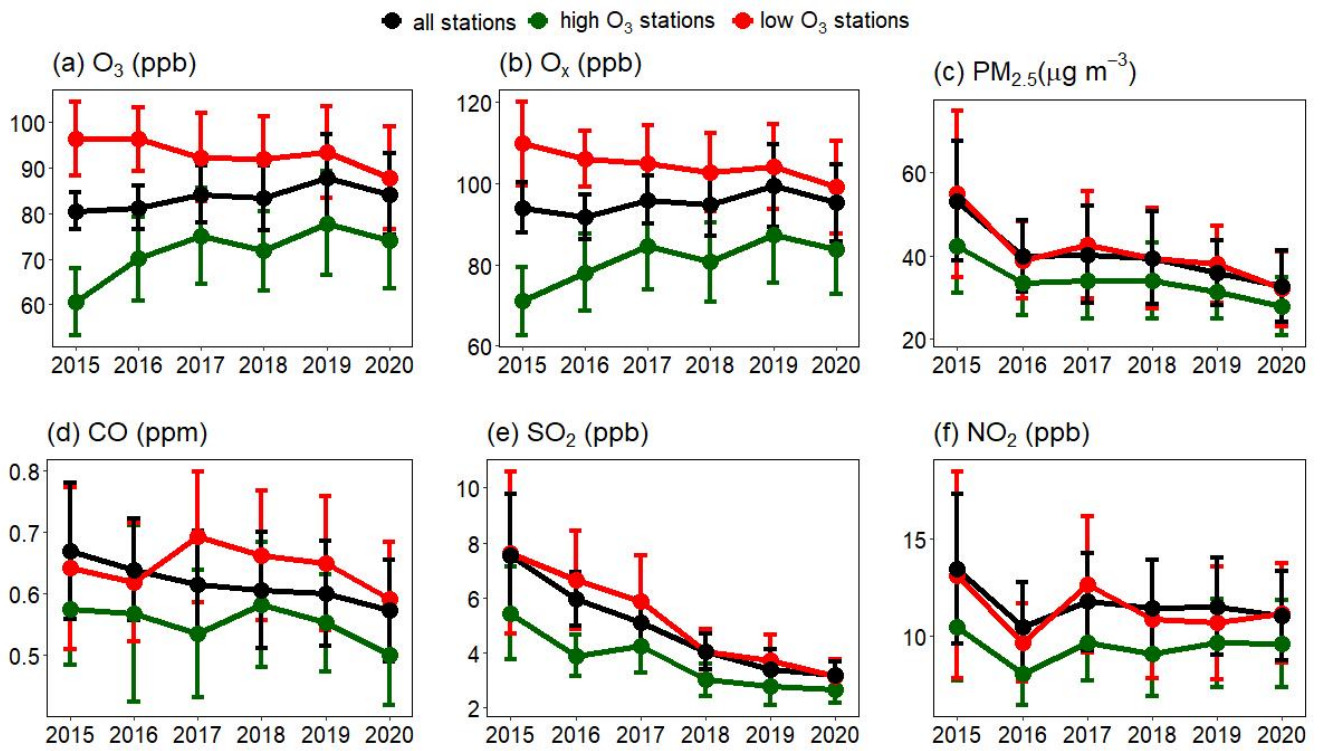

**Figure S2.** The same as Figure S1, but the criterion of low O<sub>3</sub> stations is 19 days, and the number of low O<sub>3</sub> stations is 15.

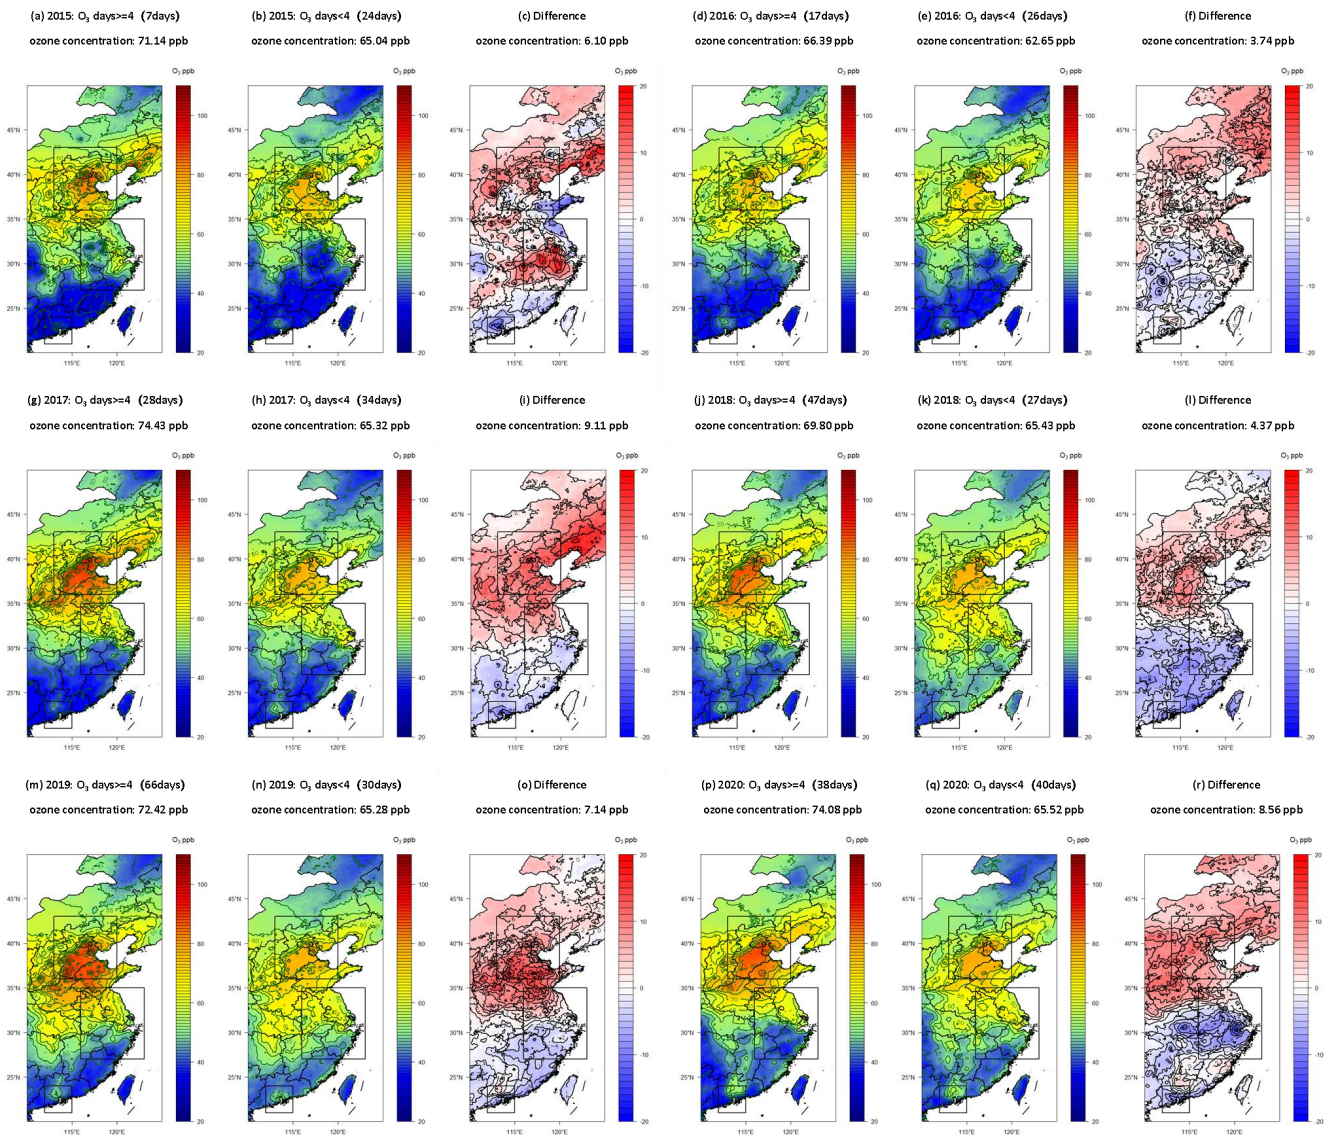

**Figure S3.** Spatial distribution of daily mean MDA8 O<sub>3</sub> (in ppb per day) of O<sub>3</sub>-exceeding days in BTH for O<sub>3</sub> episodes with four or more consecutive O<sub>3</sub>-exceeding days, O<sub>3</sub> episodes with less than four consecutive O<sub>3</sub>-exceeding days and their difference in 2015–2020.

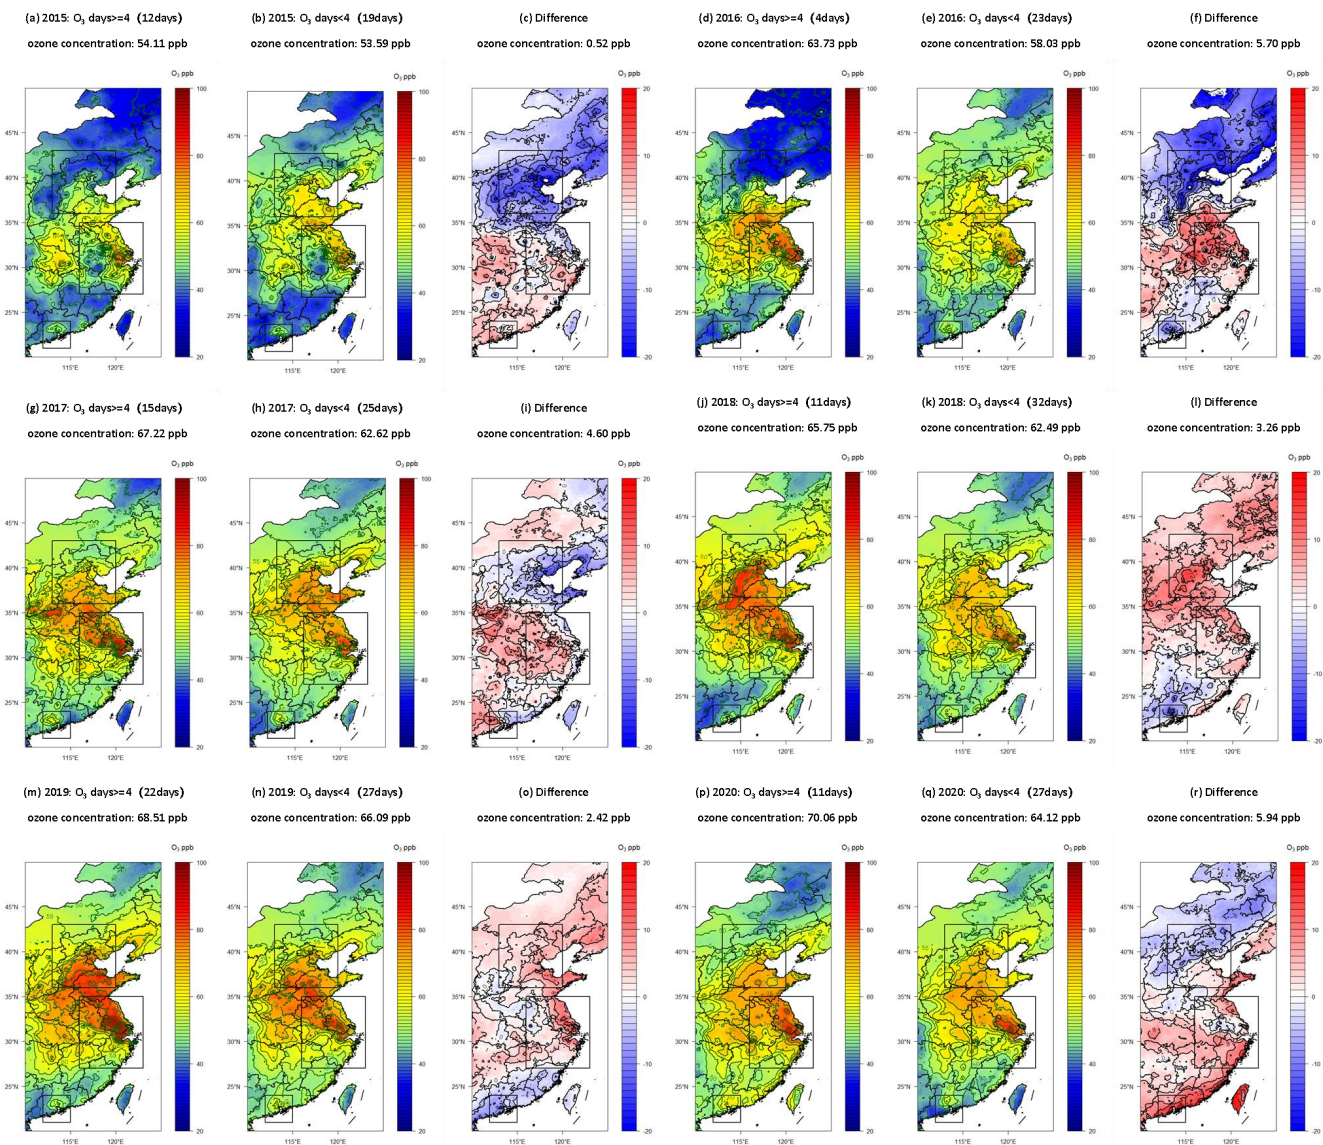

Figure S4. Same as Figure S3, but for YRD.

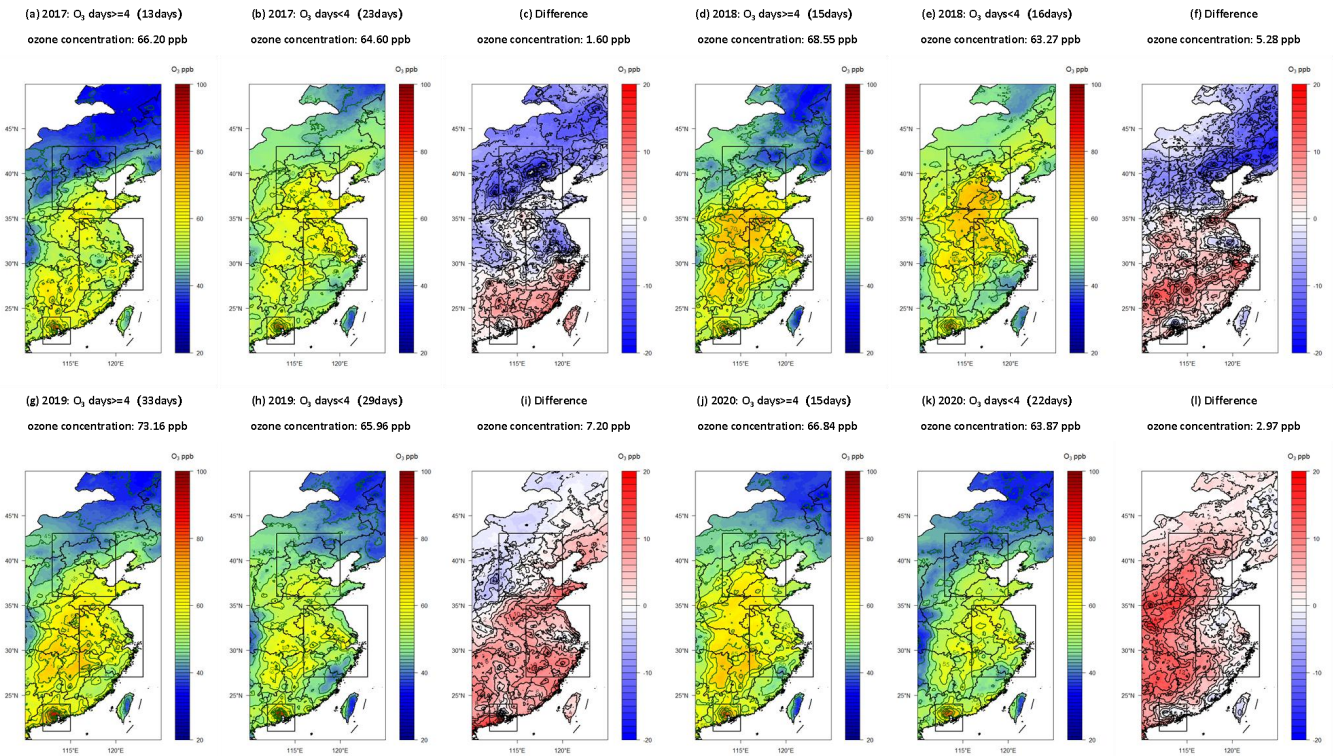

25 Figure S5. Same as Figure S3, but for PRD.

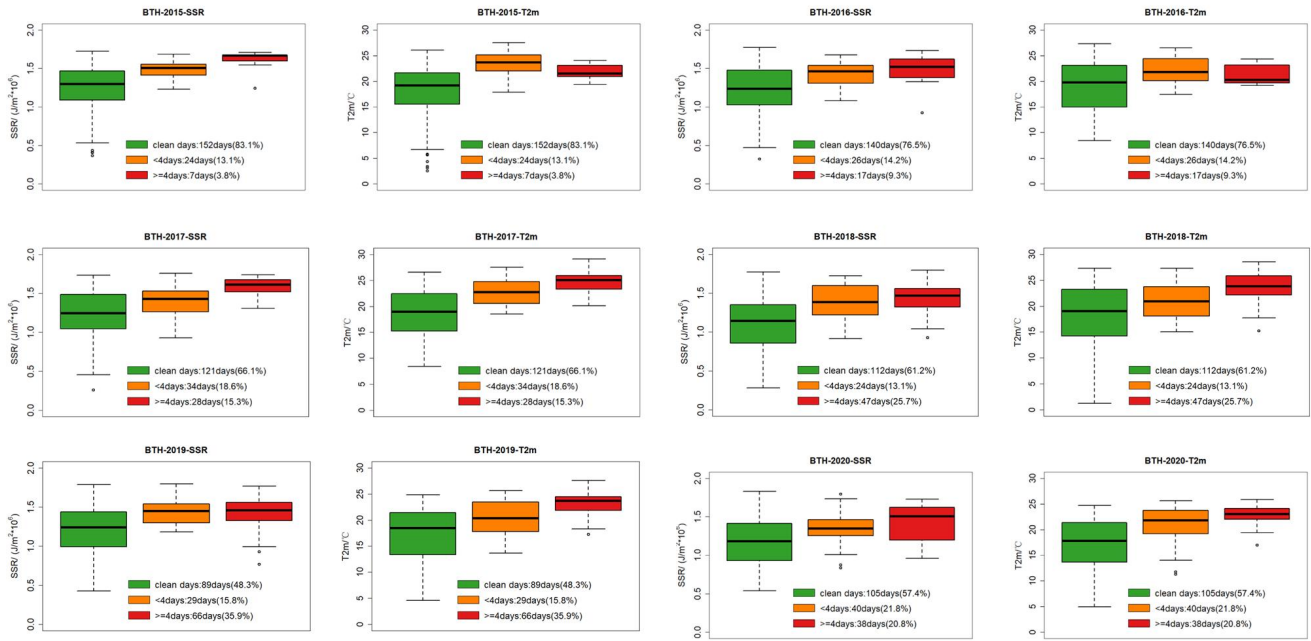

**Figure S6.** Solar radiation (SSR) and temperature (T2m) at the surface in BTH in April–September 2015–2020 for  $\text{O}_3$  episodes with four or more consecutive  $\text{O}_3$ -exceeding days, clean days (non- $\text{O}_3$ -exceeding days) and  $\text{O}_3$  episodes with less than four consecutive  $\text{O}_3$ -exceeding days.

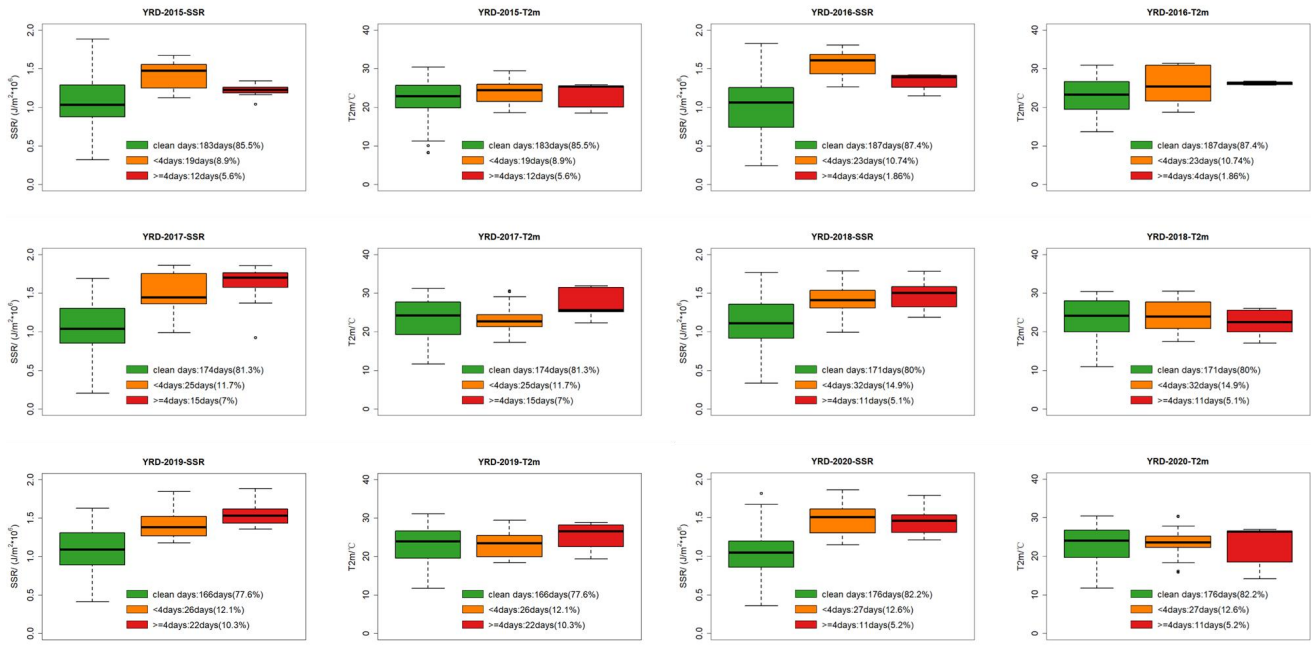

Figure S7. Same as Figure S6, but for YRD in April–October 2015–2020.



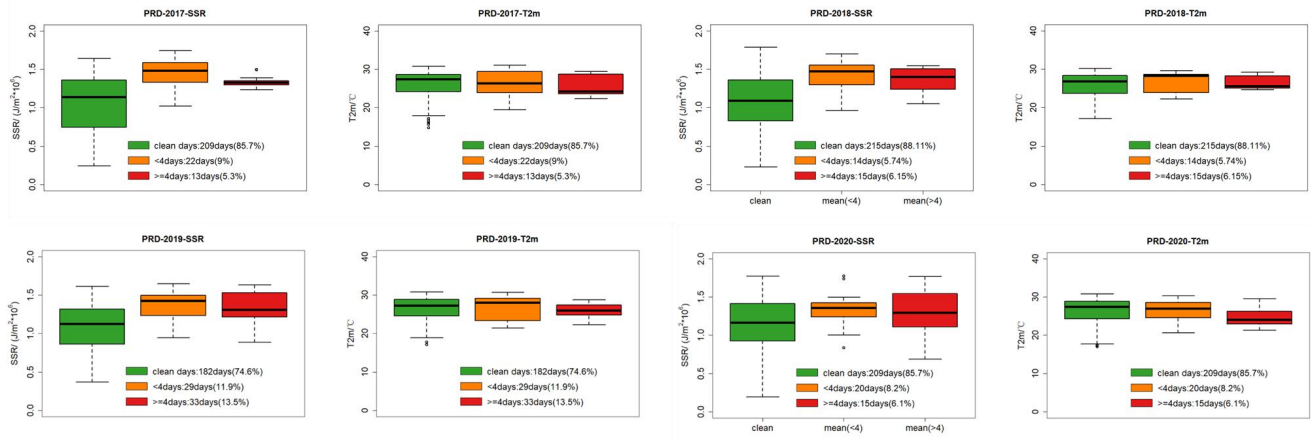

**Figure S8.** Same as Figure S6, but for PRD in April–November 2017–2020.

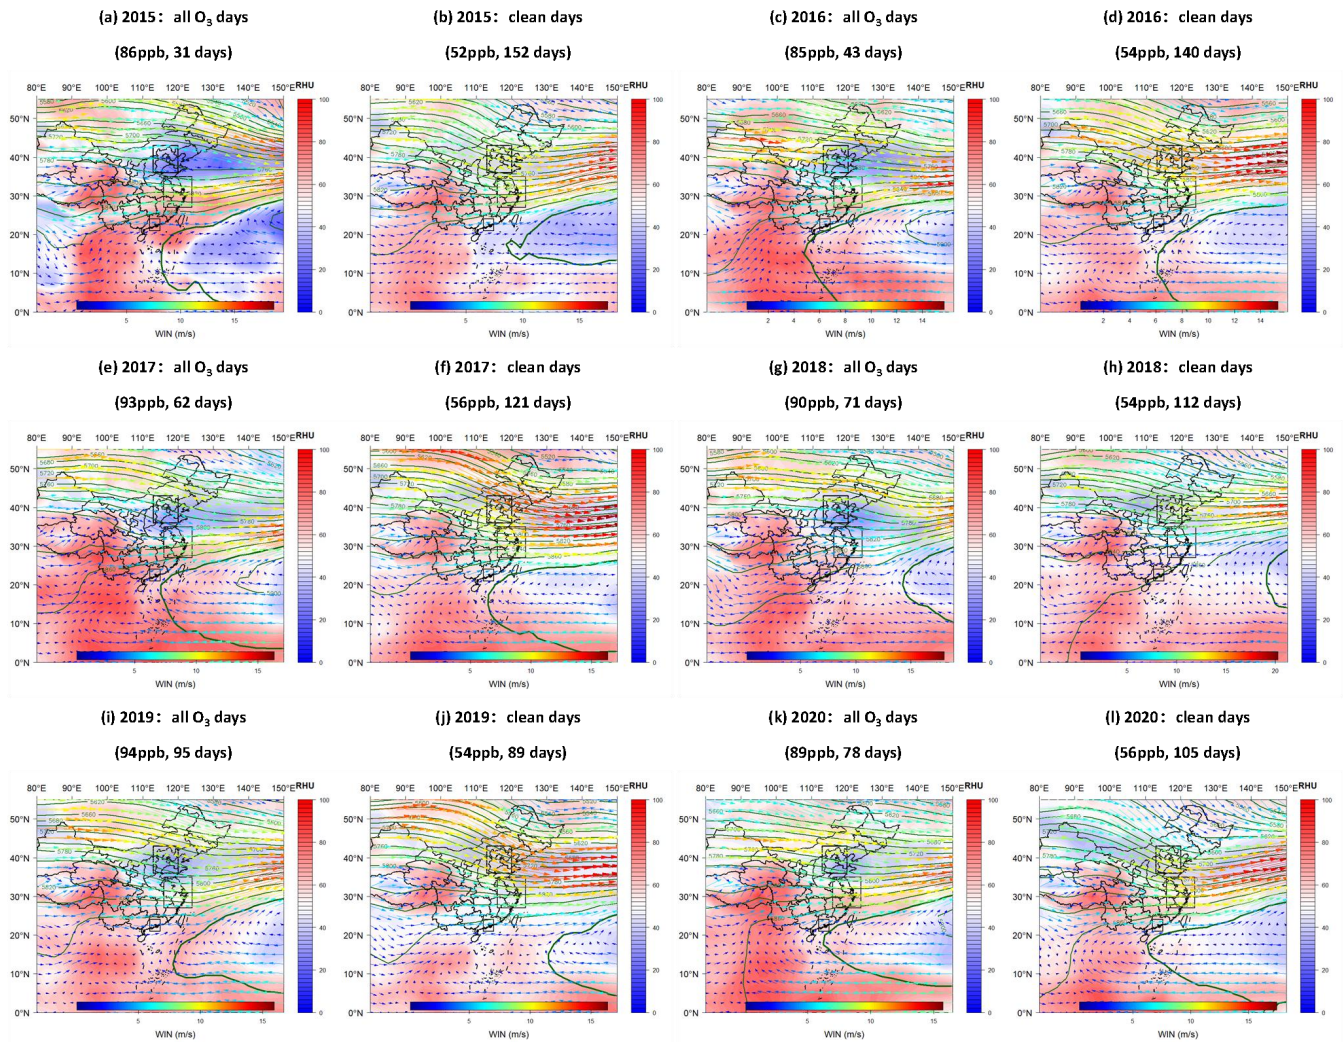

35

**Figure S9.** Composite 500 hPa geopotential height contours, humidity and winds in BTH in April-September for O<sub>3</sub>-exceeding days and clean days in 2015–2020.

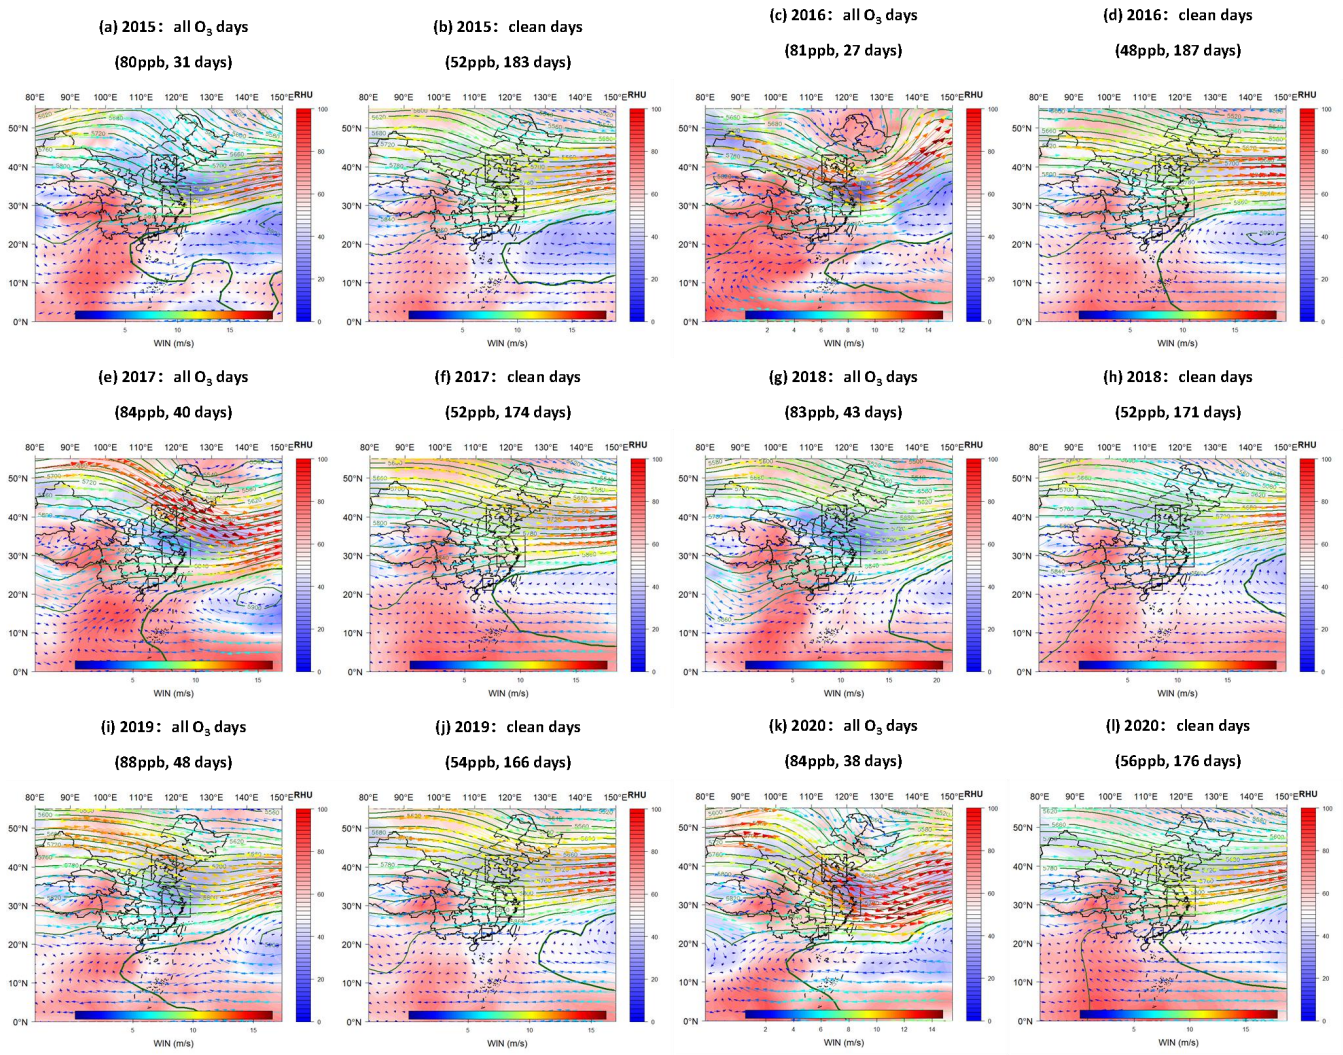

**Figure S10.** Composite 500 hPa geopotential height contours, humidity and winds in YRD in April–October for O<sub>3</sub>-exceeding days and clean days in 2015–2020.

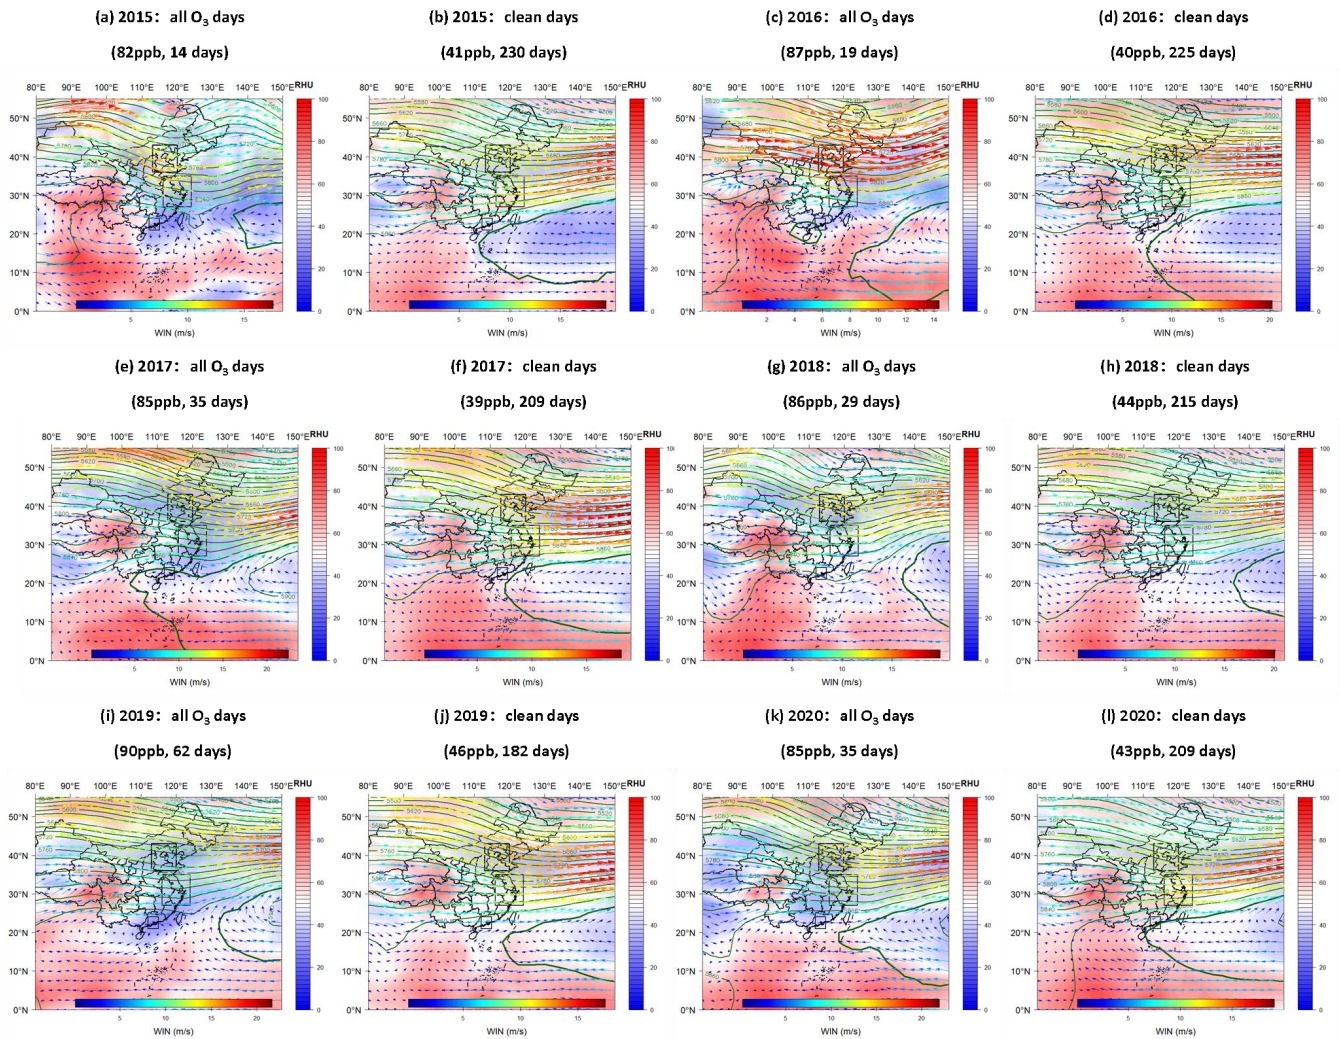

**Figure S11.** Composite 500 hPa geopotential height contours, humidity and winds in PRD in April–November for O<sub>3</sub>-exceeding days and clean days in 2015–2020.
